# Supplementary material
Source: HighWire-hosted journal article supplement (http://www.cmaj.ca/highwire/filestream/57692/field_highwire_adjunct_files/1/newly-booth-appendix_2.pdf)
Supplement: newly-booth-appendix_2.pdf [file newly-booth-appendix_2.pdf]

**Appendix 2 (as submitted by author). Risk of serious liver disease among 438,069 adults with newly diagnosed type 2 diabetes mellitus and 2,059,708 matched adults without diabetes mellitus**

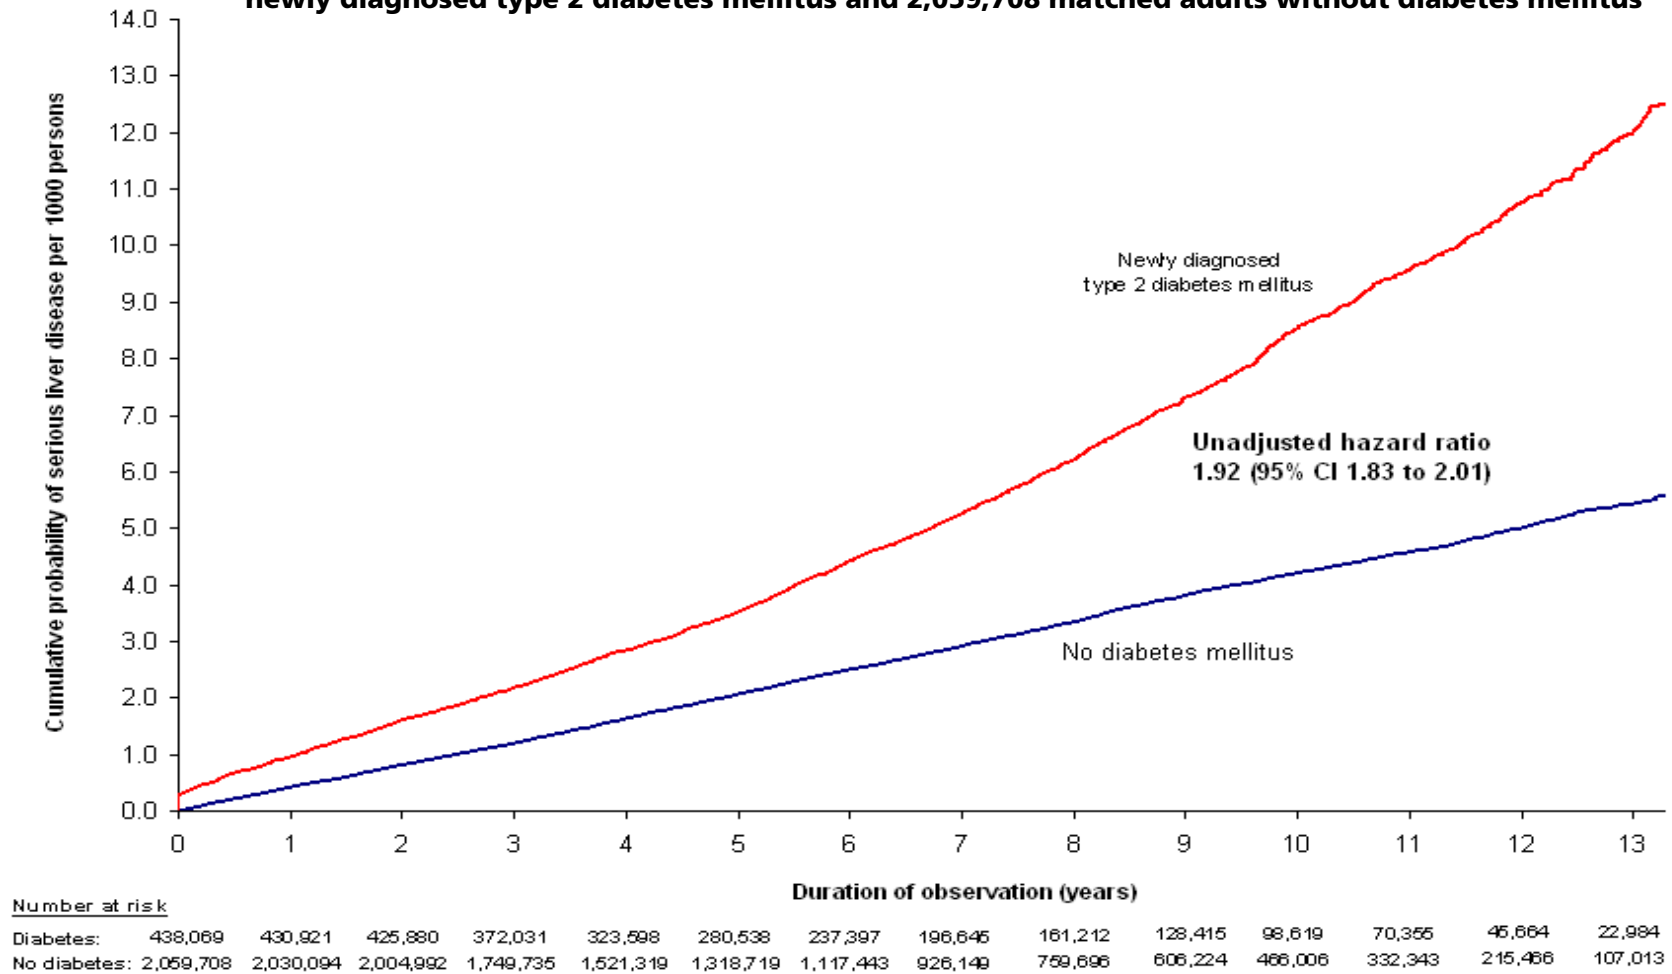

Appendix to: Porepa L, Ray JG, Sanchez-Romeu P, et al. Newly diagnosed diabetes mellitus as a risk factor for serious liver disease. CMAJ 2010. DOI 10.1503/cmaj.092144. Copyright © 2010 Canadian Medical Association
